# Supplementary material for: Computational and experimental analysis of short peptide motifs for enzyme inhibition
Source: PLOS journal article supplement (doi:10.1371/journal.pone.0182847), 2017-08-15
Supplement: S7 (10.1371/journal.pone.0182847.s007) [file journal.pone.0182847.s007]

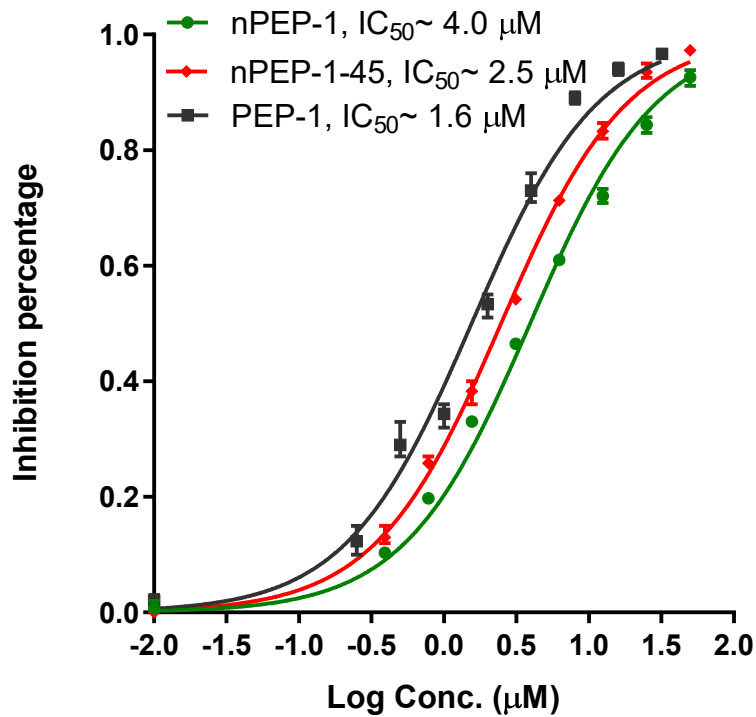

**S6 Fig. Curve fit determining the  $IC_{50}$  values of nPEP-1 “FKRYKRWGSC” (green), nPEP-1-45 “FKRYRRWGSC” (red) and PEP-1 (black) for inhibiting  $\beta$ -Gal.** GraphPad Prism 5 was used for enzyme kinetics fitting to the equation:  $Y = \text{Bottom} + (\text{Top} - \text{Bottom}) / (1 + 10^{(X - \text{LogIC}_{50})})$ . Here, Bottom is constrained to 1 which represents the maximal inhibition of 100% and Top is constrained to 0 which represents the minimal inhibition of 0%. All tests included three replicates. Error bar: range of data.
